# Supplementary material for: The shutting down of the insulin pathway: a developmental window for Wolbachia load and feminization
Source: PubMed Central journal article supplement (PMC7324399; doi:10.1038/s41598-020-67428-1), 2020-06-29
Supplement: 41598_2020_67428_MOESM1_ESM.pdf [file 41598_2020_67428_MOESM1_ESM.pdf]

The shutting down of the insulin pathway: a developmental window for *Wolbachia* load and feminization.

Benjamin Herran, Sandrine Geniez, Carine Delaunay, Maryline Raimond, Jérôme Lesobre, Joanne Bertaux, Barton Slatko, Pierre Grève

| Experiment | Name       | Sequence                 | Size | Tm (°C) |
|------------|------------|--------------------------|------|---------|
| qPCR       | qWsp_F     | TGGTGCAGCATTTACTCCAG     | 20   | 60,7    |
|            | qWsp_R     | TCGCTTGATAAGCAAAACCA     | 20   | 57,7    |
|            | qAv-IAG_F  | GAGGTATGAGATCCGATGTG     | 20   | 59.5    |
|            | qAv- IAG_R | AAATGCCAATTCATCTTCAGG    | 21   | 62.7    |
| RT-qPCR    | qAv-IAG_F  | GAGGTATGAGATCCGATGTG     | 20   | 59.5    |
|            | qAv- IAG_R | AAATGCCAATTCATCTTCAGG    | 21   | 62.7    |
|            | qAv-RbL8_F | AACTGGAGATAGAGGCAA       | 19   | 57.0    |
|            | qAv-RbL8_R | CCACCAGCAGCAATTC         | 16   | 59.4    |
|            | qTolC-F    | GATTGGCGAAGATGCTGATG     | 20   | 61,7    |
|            | qTolC-R    | ACTTCCATTCCCCTGCT        | 18   | 60,8    |
|            | qVirB3_F   | TGCAATGCTTTTTTGGTGTGAG   | 21   | 62,1    |
|            | qVirB3_R   | ATTTGGAGCATTTTCCCAATTTT  | 23   | 61,9    |
|            | qVirB8_F   | TGATGCTCTTCAAGTGAGGTTTTC | 24   | 62      |
|            | qVirB8_R   | GATCATTCATTTCAAGCGATGC   | 22   | 61,8    |
|            | qwsp_F     | TGGTGCAGCATTTACTCCAG     | 20   | 60,7    |
|            | qwsp_R     | TCGCTTGATAAGCAAAACCA     | 20   | 57,7    |

Supplementary Table S1. Primers used to amplify the various sequences by qPCR or RT-qPCR. The primers were designed to amplify only the cDNA and do not amplify genomic DNA.
